# Supplementary material for: Dietary Habits and Nutritional Status of TB/HIV/AIDS Co-Infected Patients Attending the TB Clinic in Kyangwali Health Center: A cross-sectional study
Source: Research Square preprint supplement (doi:10.21203/rs.3.rs-6819006/v1), 2025-07-24
Supplement: Supplementary file 1 [file d072a1e4471a10f478c1e8bc.docx]

## **Annex: Data collection tools**

**Date of interview:/…………/………….**

**SECTION A: DEMOGRAPHIC AND BACKGROUND INFORMATION**

**A1.** Participant ID…………………

**A2.** Name……………………………………………….

**A3**. Age………………...

**A4.** Village………………………….

**A5.** Parish ………………………………….

**A6. Gender**

1.Female 2. Male

**A7. Religion**

Catholic Busobozi

Pentecost Muslim

Other…………………...

**A8. Marital status**

Single Widowed/divorced Married/Cohabiting

**A9. Educational status**

No formal education Secondary education

Primary education Tertiary education

**A10. Occupation**

Employed

Unemployed

**A11. Number of individuals in the household**

1.Less than 5 members 2. 5 members and above

**A12. Do you have a vegetable garden at home?**

1.Yes 2. No

**A13. If yes, what vegetables do you have in your garden?**

**……………………….**

**………………………**

**…………………………**

**…………………………**

**SECTION B: ANTHROPOMETRY ASSESSMENT**

This section is to be filled by the trained interviewer with assistance from trained nurse during assessment.

Weight (Kg) Height (cm)

Mid Upper Arm Circumference (MUAC) (cm)

Body Mass Index (Kg/m2)

**SECTION C: LIFESTYLE / BEHAVIORAL INFORMATION**

**C1. Choose one of the following:**

1. I am a non-smoker (never smoked before)

2.Former smoker (smoked before, but stopped 3 months ago)

3. Current smoker (smokes at least one cigarette, pipe or cigar per day for at least 6 months prior to entering the study)

**C2. Choose one of the following:**

1. I used to drink alcohol 3 or more times per week
2. I used to drink alcohol less than 3 times per week
3. I do not drink alcohol

[**SECTION**](#_Toc126565265) **D: DIETARY ASSESSMENT INFORMATION**

This questionnaire asks some background information about you, especially what you usually feed / eat.

Participant ID……………………………………

Signature…………………….

How many meals do you usually eat a day?......................................................................................

What foods are your main preferences?...............................................................................................

……………………………………………………………………………

What are some of the common dishes you eat?..................................................................................

…………………………………………………………………………………………………

In the last Seven days, did you feed the child any of the following foods?

If yes, how frequent, what was the main source?

What was the main method of preparation?

| **No.** | **Food groups** | **Eaten yesterday (Y/N)** | **No. of time consumed** | | **Main source** | **Main method of preparation** |
| --- | --- | --- | --- | --- | --- | --- |
| **Per day** | **Per week** |  |  |
| **1** | **Cereals and grains** |  |  |  |  |  |
| 1.1 | Maize |  |  |  |  |  |
| 1.2 | Wheat |  |  |  |  |  |
| 1.3 | Rice |  |  |  |  |  |
| 1.4 | Sorghum |  |  |  |  |  |
| **2** | **Legumes** |  |  |  |  |  |
| 2.1 | Beans |  |  |  |  |  |
| 2.2 | Peas |  |  |  |  |  |
| 2.3 | Nuts |  |  |  |  |  |
| 2.3 | Soya bean |  |  |  |  |  |
| 2.4 | Simsim |  |  |  |  |  |
| **3** | **Starchy roots, tubers and plantain** |  |  |  |  |  |
| 3.1 | Sweet potatoes |  |  |  |  |  |
| 3.2 | Solanum (Irish) potatoes |  |  |  |  |  |
| 3.3 | Cassava |  |  |  |  |  |
| 3.4 | Yam |  |  |  |  |  |
| 3.5 | Pumpkin |  |  |  |  |  |
| 3.6 | Plantains (matoke) |  |  |  |  |  |
| **4** | **Vegetables** |  |  |  |  |  |
| 4.1 | Cabbage |  |  |  |  |  |
| 4.2 | Carrots |  |  |  |  |  |
| 4.3 | Cauliflower |  |  |  |  |  |
| 4.4 | Tomatoes |  |  |  |  |  |
| 4.5 | Onions |  |  |  |  |  |
| 4.6 | Broccoli |  |  |  |  |  |
| 4.7 | Spinach |  |  |  |  |  |
| 4.8 | Mushrooms |  |  |  |  |  |
| 4.9 | Aubergines/biriganya |  |  |  |  |  |
| 4.10 | Egg plant |  |  |  |  |  |
| 4.11 | Amaranth/Dodo |  |  |  |  |  |
| 4.12 | Garlic |  |  |  |  |  |
| 4.13 | Sukuma wiki (*B. oleracea*) |  |  |  |  |  |
| **5** | **Fruits and juice** |  |  |  |  |  |
| 5.1 | Bananas |  |  |  |  |  |
| 5.2 | Mango |  |  |  |  |  |
| 5.3 | Passion fruit |  |  |  |  |  |
| 5.4 | Guavas |  |  |  |  |  |
| 5.5 | Pawpaw |  |  |  |  |  |
| 5.6 | Melon |  |  |  |  |  |
| 5.7 | Apple |  |  |  |  |  |
| 5.8 | Citrus (oranges/  tangerine) |  |  |  |  |  |
| 5.9 | Pineapples |  |  |  |  |  |
| 5.10 | Avocado |  |  |  |  |  |
| 5.11 | Jack fruit |  |  |  |  |  |
| 5.12 | Sugar cane |  |  |  |  |  |
| **6** | **Meat and meat products** |  |  |  |  |  |
| 6.1 | Beef |  |  |  |  |  |
| 6.2 | Goat |  |  |  |  |  |
| 6.3 | Pork (pig) |  |  |  |  |  |
| 6.4 | Ham/mutton (sheep) |  |  |  |  |  |
| 6.5 | Sausage |  |  |  |  |  |
| 6.6 | Offal |  |  |  |  |  |
| **7** | **Poultry and eggs** |  |  |  |  |  |
| 7.1 | Chicken |  |  |  |  |  |
| 7.2 | Duck |  |  |  |  |  |
| 7.3 | Turkey |  |  |  |  |  |
| 7.4 | Eggs |  |  |  |  |  |
| **8** | **Milk and milk products** |  |  |  |  |  |
| 8.1 | Cow’s milk |  |  |  |  |  |
| 8.2 | Goats milk |  |  |  |  |  |
| 8.3 | Fermented milk/yoghurt |  |  |  |  |  |
| 8.4 | Ghee/Butter |  |  |  |  |  |
| 8.5 | Cheese |  |  |  |  |  |
| 8.6 | Chocolate |  |  |  |  |  |
| **9** | **Fish** |  |  |  |  |  |
| 9.1 | Fresh fish |  |  |  |  |  |
| 9.2 | Dry fish |  |  |  |  |  |
| 9.3 | Fish oils |  |  |  |  |  |
| **10** | **Fats and oils** |  |  |  |  |  |
| 10.1 | Cooking fat (solid) |  |  |  |  |  |
| 10.2 | Cooking oil (liquid) |  |  |  |  |  |
| 10.3 | Margarine |  |  |  |  |  |
| **11** | **Sugars and confectionaries** |  |  |  |  |  |
| 11.1 | Sugar |  |  |  |  |  |
| 11.2 | Honey |  |  |  |  |  |
| 11.3 | Cakes/Biscuits |  |  |  |  |  |
| **12** | **Condiments, spices and beverages** |  |  |  |  |  |
| 12.1 | Tea |  |  |  |  |  |
| 12.2 | Coffee |  |  |  |  |  |
| 12.3 | Spices |  |  |  |  |  |
| 12.4 | Salt |  |  |  |  |  |
| 12.5 | Non-alcoholic beverage (e.g. soda, Safi, splash) |  |  |  |  |  |

**DIETARY DIVERSITY QUESTIONNAIRE**

Please describe the foods (meals and snacks) that you ate or drank yesterday during the day and night, whether at home or outside the home. Star with the first food or drink of the morning.

| Breakfast | Snack | Lunch | Snack | Dinner | Snack |
| --- | --- | --- | --- | --- | --- |
|  |  |  |  |  |  |
|  |  |  |  |  |  |
|  |  |  |  |  |  |
|  |  |  |  |  |  |

| **Question number** | **FOOD GROUPS** | **Examples** | **Yes = 1**  **No = 0** |
| --- | --- | --- | --- |
| 1 | CEREALS | Corn/maize, rice, wheat, sorghum, millet, or any other grains or foods made from those (e.g., bread, noodles, porridge, or other grain products) + insert local foods, e.g., ugali, nshima, porridge, or paste |  |
| 2 | WHITE ROOTS AND TUBERS | White potatoes, white yams, white cassava, or other foods made from roots |  |
| 3 | VITAMIN A RICH VEGETABLES AND TUBERS | Pumpkin, carrot, squash, or sweet potato that are orange inside + locally available vitamin A-rich vegetables (e.g., red sweet potatoes) |  |
| 4 | DARK GREEN LEAFY VEGETABLES | Dark green, leafy vegetables, including wild forms and locally available vitamin A-rich leaves such as amaranth, cassava leaves, kale, and spinach. |  |
| 5 | OTHER VEGETABLES | Other vegetables (e.g., tomatoes, onion, eggplant) + other locally available vegetables |  |
| 6 | VITAMIN A RICH  FRUITS | ripe mango, cantaloupe, apricot (fresh or  dried), ripe papaya, dried peach, and 100%  fruit juice made from these + *other locally available vitamin A-rich fruits* |  |
| 7 | OTHER FRUITS | other fruits, including wild fruits and  100% fruit juice made from these |  |
| 8 | ORGAN MEAT | liver, kidney, heart, or other organ meats, or  blood-based foods |  |
| 9 | FLESH MEATS | beef, pork, lamb, goat, rabbit, game,  chicken, duck, other birds, insects |  |
| 10 | EGGS | eggs from chicken, duck, guinea fowl, or  Any other egg |  |
| 11 | FISH AND  SEAFOOD | fresh or dried fish or shellfish |  |
| 12 | LEGUMES, NUTS  AND SEEDS | dried beans, dried peas, lentils, nuts, seeds  or foods made from these (e.g., hummus,  peanut butter) |  |
| 13 | MILK AND MILK  PRODUCTS | milk, cheese, yogurt, or other milk  products |  |
| 14 | OILS AND FATS | oil, fats, or butter added to food or used for  cooking |  |
| 15 | SWEETS | sugar, honey, sweetened soda, or sweetened  juice drinks, sugary foods such as  chocolates, candies, cookies, and cakes |  |
| 16 | SPICES,  CONDIMENTS,  BEVERAGES | spices (black pepper, salt), condiments  (soy sauce, hot sauce), coffee, tea, alcoholic  beverages |  |
|  | HOUSEHOLD  LEVEL ONLY | Did you or anyone in your household eat anything (meal or  snack) OUTSIDE the home yesterday? |  |
|  | INDIVIDUAL  LEVEL | Did you eat anything (meal or snack) OUTSIDE the home yesterday? |  |
